# Supplementary material for: Machine learning-based prediction of LDL cholesterol: performance evaluation and validation
Source: PeerJ. 2025 Apr 9;13:e19248. doi: 10.7717/peerj.19248 (PMC11992974; doi:10.7717/peerj.19248)
Supplement: Supplemental Information 1 [file peerj-13-19248-s001.xlsx]

## Sheet: feature_importances
	RandomForest Feature Importances	DecisionTree Feature Importances	XGBoost Feature Importances
TC	0.788494	0.792121	0.826486
TG	0.112103	0.108453	0.0879537
HDL-C	0.0619503	0.0614381	0.0389176
Age	0.0325168	0.0332125	0.00888132
Gender	0.00493572	0.00477583	0.0377617
